# Supplementary material for: Energy band tunable TixSn1−xO2 photoanode for efficient non-TiO2 type dye sensitized solar cells
Source: Royal Society of Chemistry journal article supplement (doi:10.1039/c3ta11481c), 2013-01-01
Supplement: c3ta11481c.pdf [file c3ta11481c.pdf]

Supporting information:

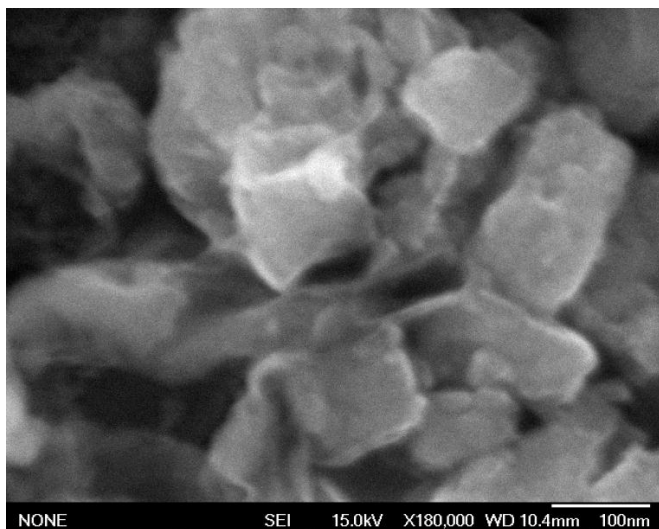

Figure S1. The morphology of the light scattering SnO<sub>2</sub> particles.

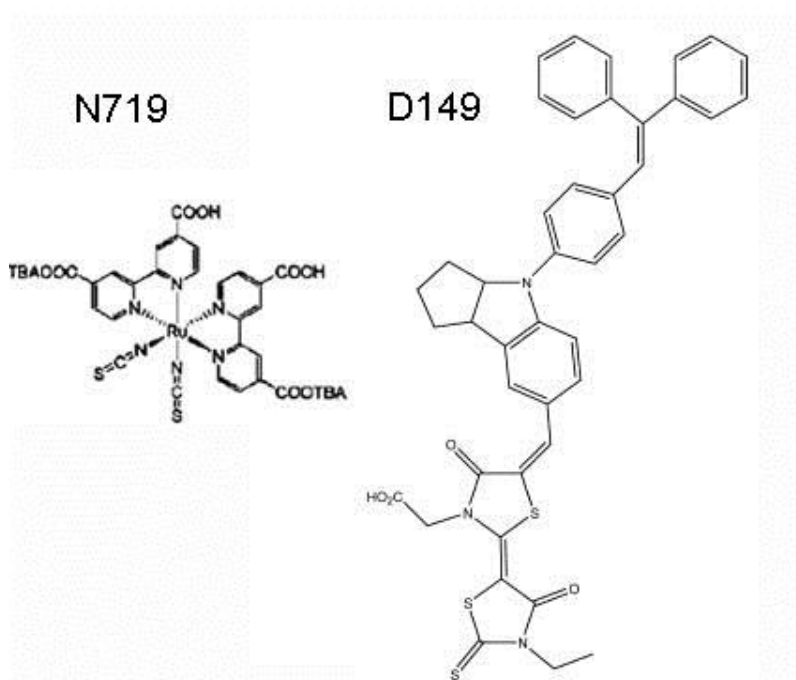

Figure S2. The chemical structures of N719 and D149.

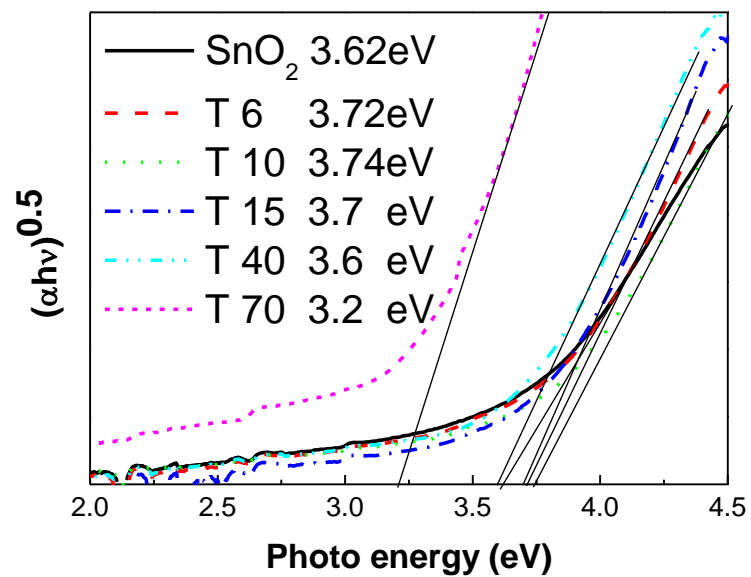

Figure S3. The curves of  $(\alpha h\nu)^{\frac{1}{2}}$  versus  $\lambda$  of  $\text{Ti}_x\text{Sn}_{1-x}\text{O}_2$  photoanodes, the inset indicates the obtained indirect optical band gap energy.

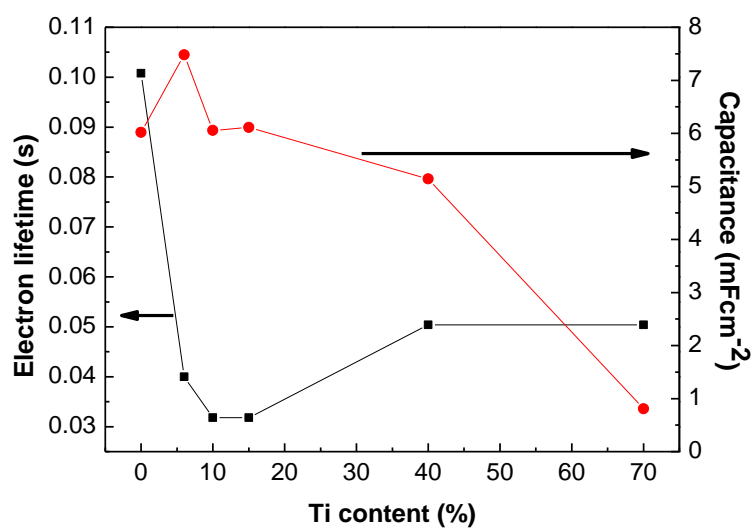

Figure S4. The electron lifetime of DSSCs and capacitance of  $\text{Ti}_x\text{Sn}_{1-x}\text{O}_2$  photoanodes measure by EIS.

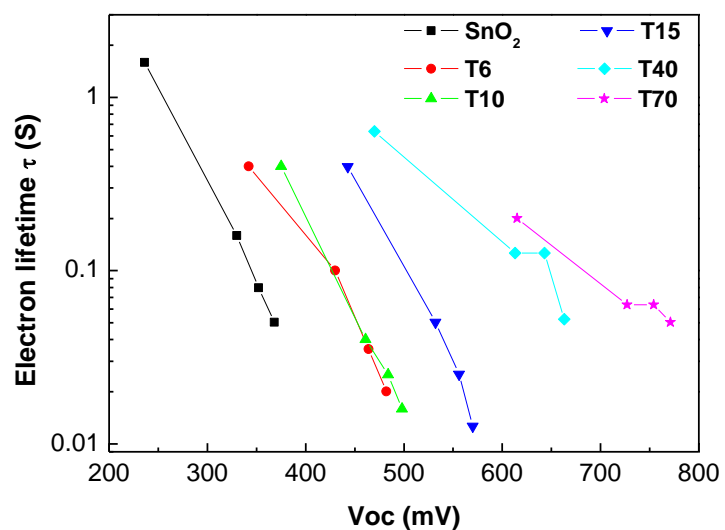

Figure S5. The variation of electron lifetime with photovoltage of DSSCs under different light intensities.

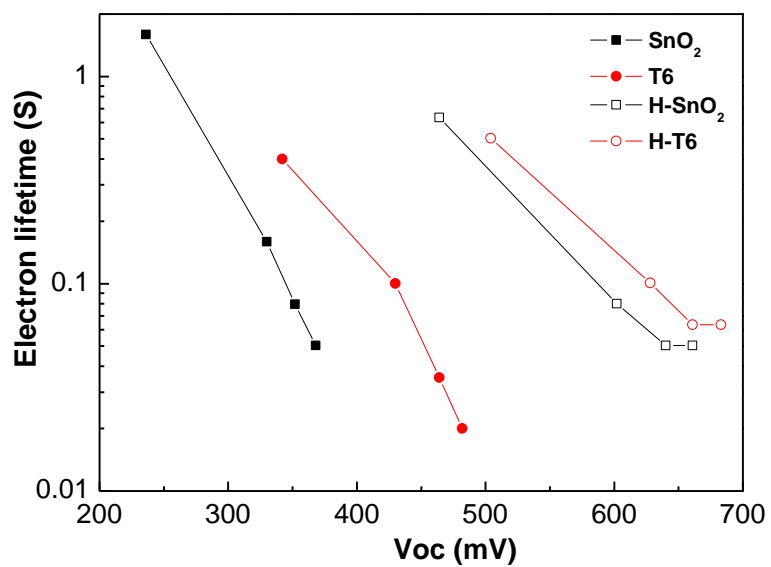

Figure S6. The electron lifetime of SnO<sub>2</sub>, T6, the hybrid photoanode H-SnO<sub>2</sub> and H-T6 under different photovoltages.
